# Supplementary material for: White-light emitting multi-lanthanide terephthalate thin films by atomic/molecular layer deposition
Source: Royal Society of Chemistry journal article supplement (doi:10.1039/d3tc00464c), 2023-01-01
Supplement: d3tc00464c1.pdf [file d3tc00464c1.pdf]

# White-light emitting multi-lanthanide terephthalate thin films by atomic/molecular layer deposition

Amr Ghazy, Mika Lastusaari and Maarit Karppinen

## SUPPORTING INFORMATION

### ALD/MLD Process Optimization

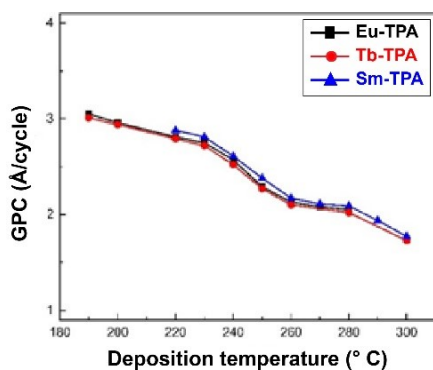

**Figure S1:** Deposition temperature dependence of GPC for representative Ln(thd)<sub>3</sub> + TPA processes (Ln = Sm, Eu, Tb). Pulse lengths: 4 s for Ln(thd)<sub>3</sub>, 7.5 s for TPA.

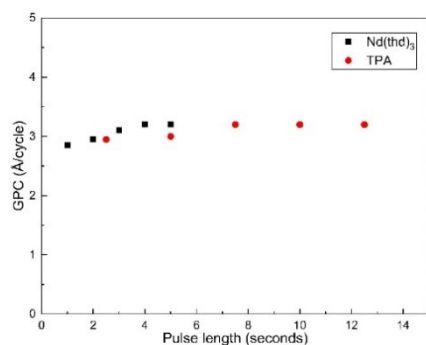

**Figure S2:** Saturation of the GPC value with increasing precursor pulse lengths for the Nd(thd)<sub>3</sub> + TPA process. Deposition temperature 190 °C.

**Table S1:** GPC values for representative Ln(thd)<sub>3</sub> + TPA processes at deposition temperature of 190 °C. Pulse lengths: 4 s for Ln(thd)<sub>3</sub>, 7.5 s for TPA.

| Lanthanide | GPC (Å/cycle) |
|------------|---------------|
| La         | 3.15          |
| Nd         | 3.15          |
| Eu         | 3.05          |
| Tb         | 2.93          |
| Er         | 2.91          |

## Emission and Excitation Spectra

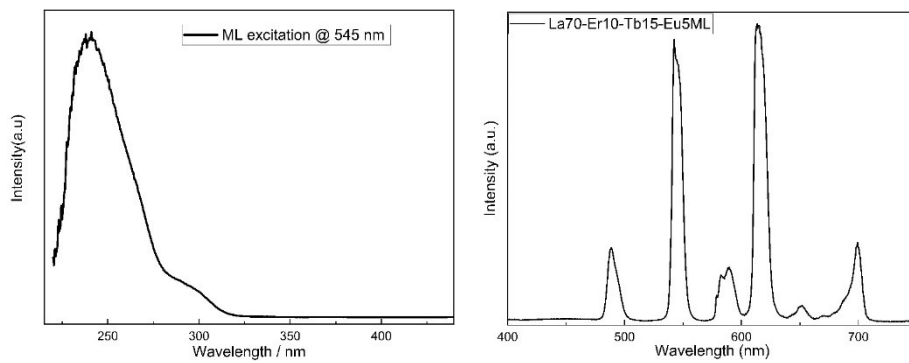

**Figure S2:** Luminescence characteristics of the multi-layer La70-Er10-Tb15-Eu5-ML thin film: (left) excitation spectrum (recorded for the 545 nm emission of  $Tb^{3+}$ ), and (right) emission (recorded at 250 nm excitation).

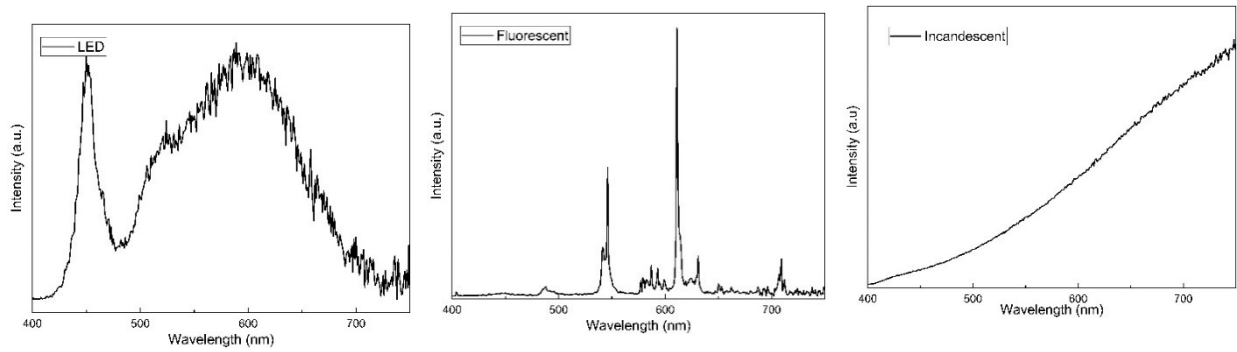

**Figure S3:** Emission spectra of commercial: (left) LED lamp, (middle) fluorescent tube, and (right) incandescent bulb.
